# Supplementary material for: Simple weak-acid derivatives of paclitaxel for remote loading into liposomes and improved therapeutic effects
Source: Royal Society of Chemistry journal article supplement (doi:10.1039/d0ra03190a), 2020-01-01
Supplement: d0ra03190a1.pdf [file d0ra03190a1.pdf]

## Supplementary material

### Simple weak-acid derivatives of paclitaxel for remote loading into liposomes and improved therapeutic effect

Jiang Yu,<sup>‡a</sup> Shuang Zhou,<sup>‡a</sup> Jinbo Li,<sup>a</sup> Yingli Wang,<sup>a</sup> Yujiao Su,<sup>a</sup> Dongxu Chi,<sup>b</sup> Jiamei Wang,<sup>a</sup> Xue Wang,<sup>b</sup> Zhonggui He,<sup>a</sup> Guimei Lin,<sup>c</sup> Dan Liu<sup>\*d</sup> and Yongjun Wang<sup>\*a</sup>

Affiliations:

<sup>a</sup> *Wuya College of Innovation, Shenyang Pharmaceutical University, Shenyang, Liaoning, 110016, P. R. China*

<sup>b</sup> *Department of Pharmaceutics, Shenyang Pharmaceutical University, Shenyang, Liaoning, 110016, P. R. China*

<sup>c</sup> *School of Pharmaceutical Science, Shandong University, 44 Wenhuxi Road, Jinan, 250012, China*

<sup>d</sup> *Key Laboratory of Structure-Based Drugs Design & Discovery of Ministry of Education, Shenyang Pharmaceutical University, Shenyang 110016, China*

\*Corresponding authors:

Prof. Dan Liu, Ph.D.

Key Laboratory of Structure-Based Drug Design and Discovery, Ministry of Education, Shenyang Pharmaceutical University, Shenyang, Liaoning, 110016, P. R. China

Tel./Fax: +86-24-4352-0218

E-mail address: sammyld@163.com;

Prof. Yongjun Wang, Ph.D.

Wuya College of Innovation, Shenyang Pharmaceutical University, Shenyang, Liaoning, 110016, P. R. China

Tel./Fax: +86-24-23986325

E-mail address: wangyongjun@syphu.edu.cn

<sup>‡</sup> Both authors contributed equally

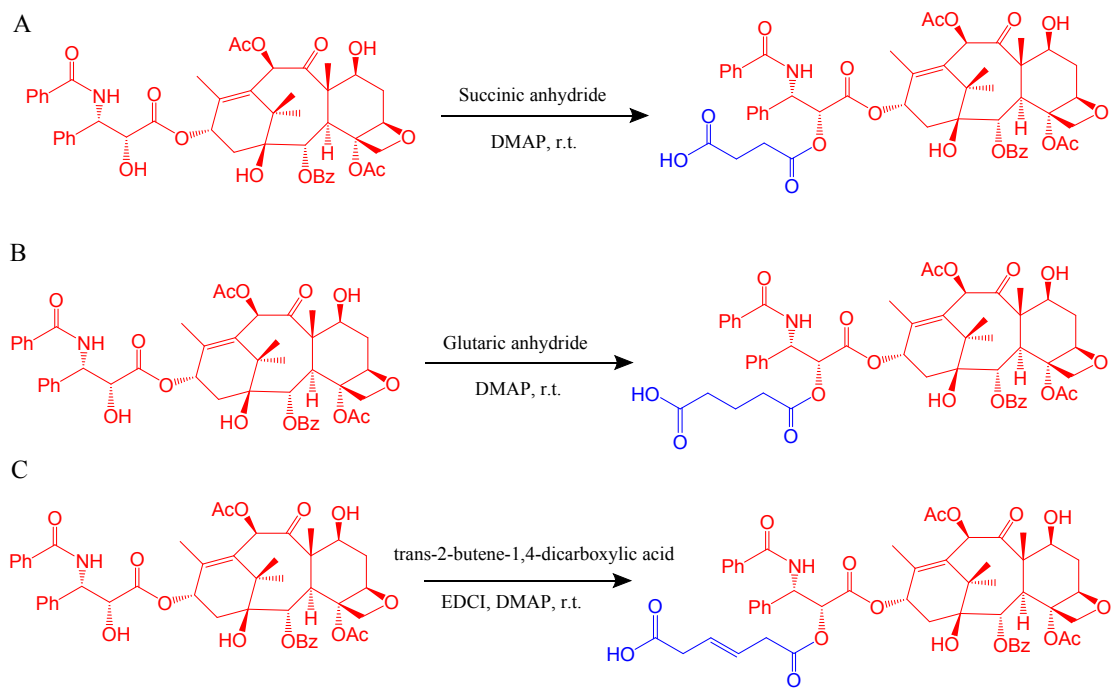

**Scheme S1** The synthetic route of PTX-SA (A), PTX-GA (B), PTX-DA (C).

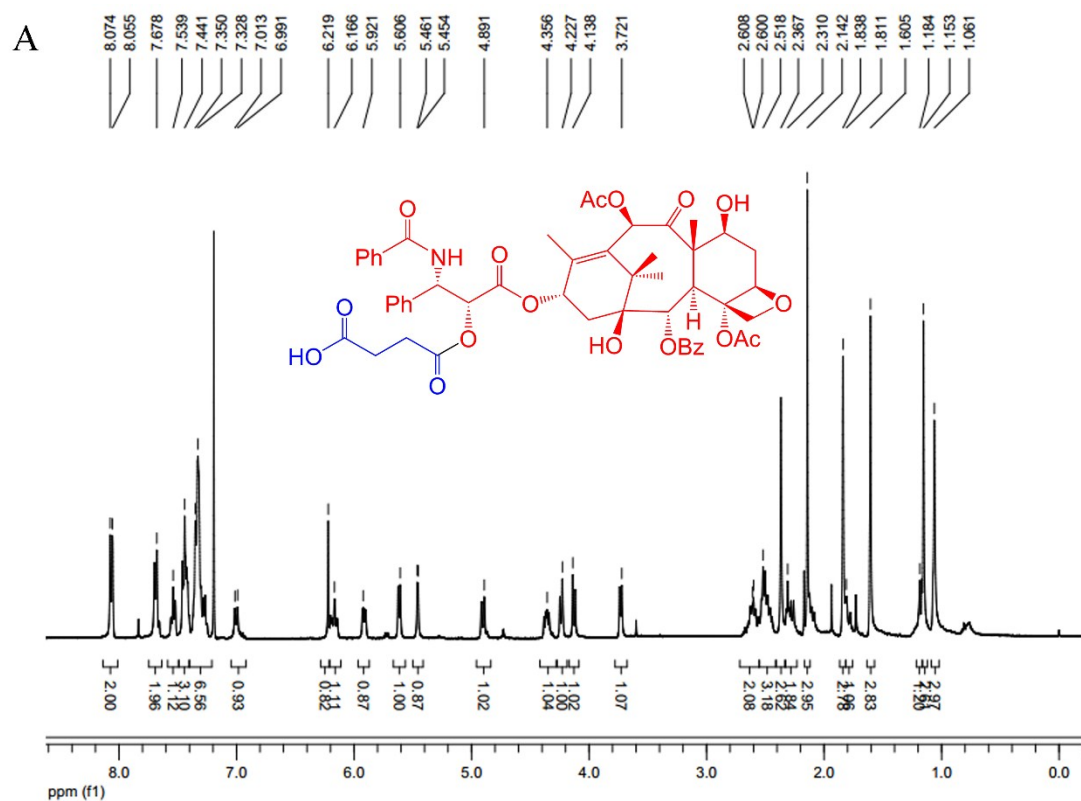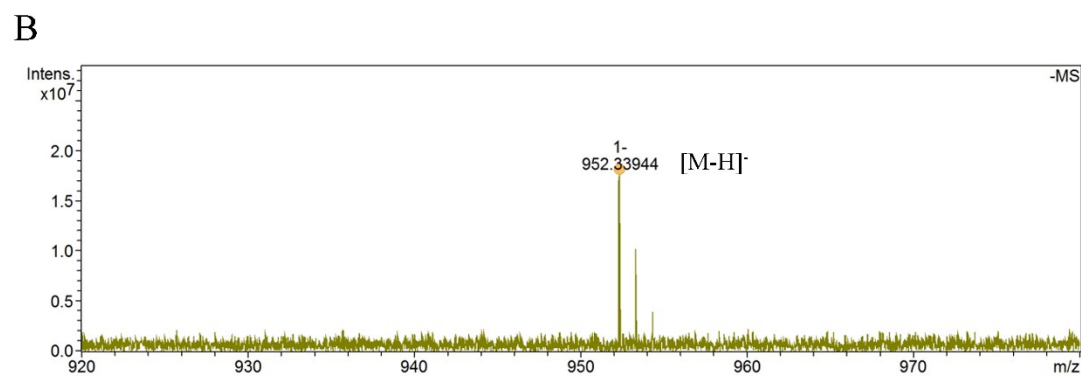

**Fig. S1** Structure confirmation of PTX-SA. (A)  $^1\text{H NMR}$ , (B) MS.

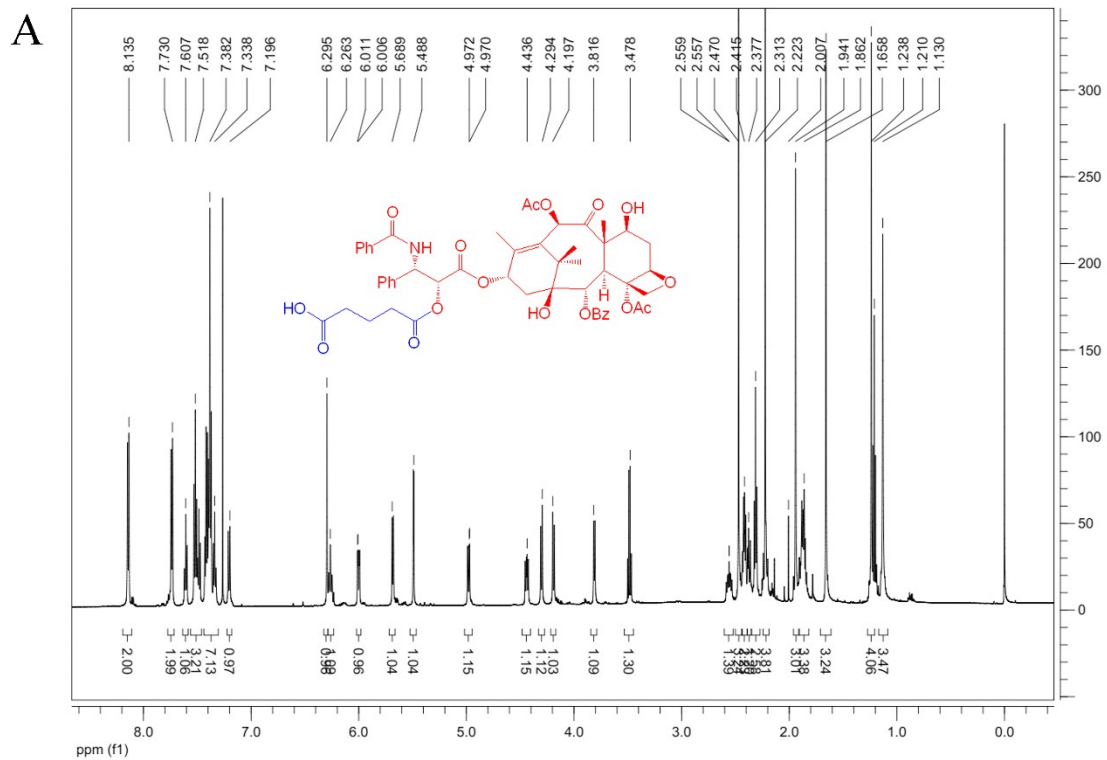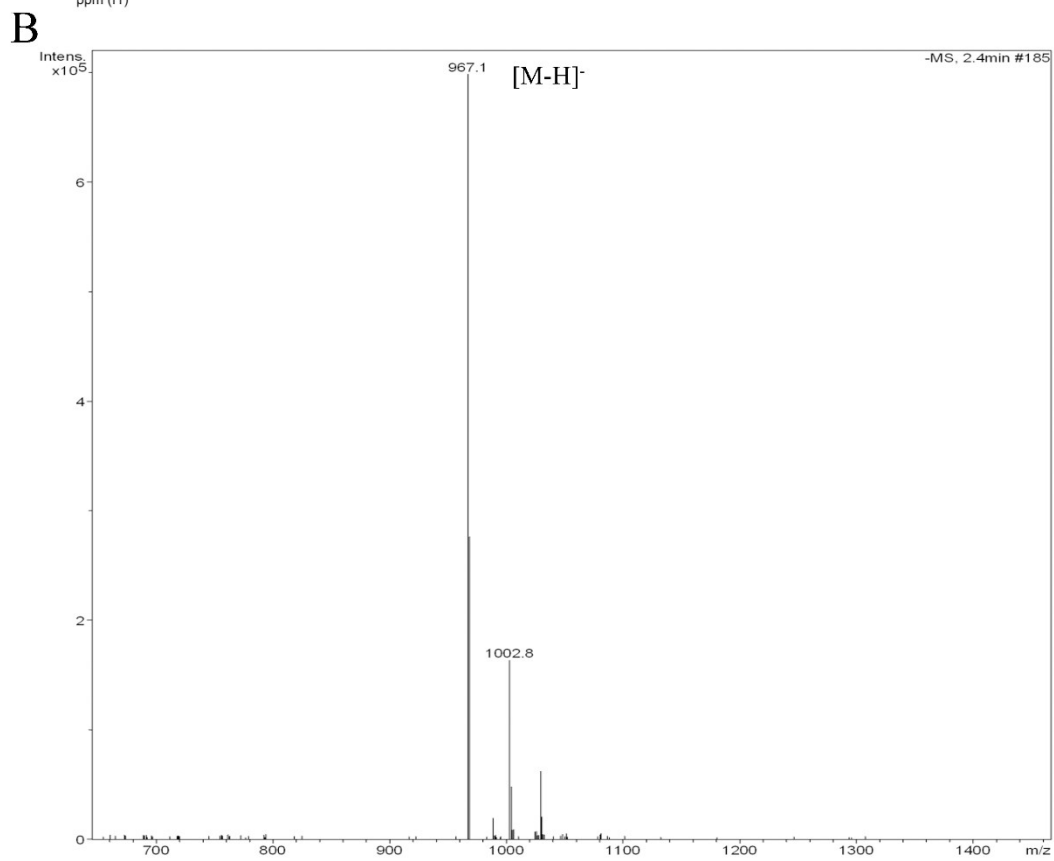

**Fig. S2** Structure confirmation of PTX-GA. (A)  $^1\text{H}$  NMR, (B) MS.

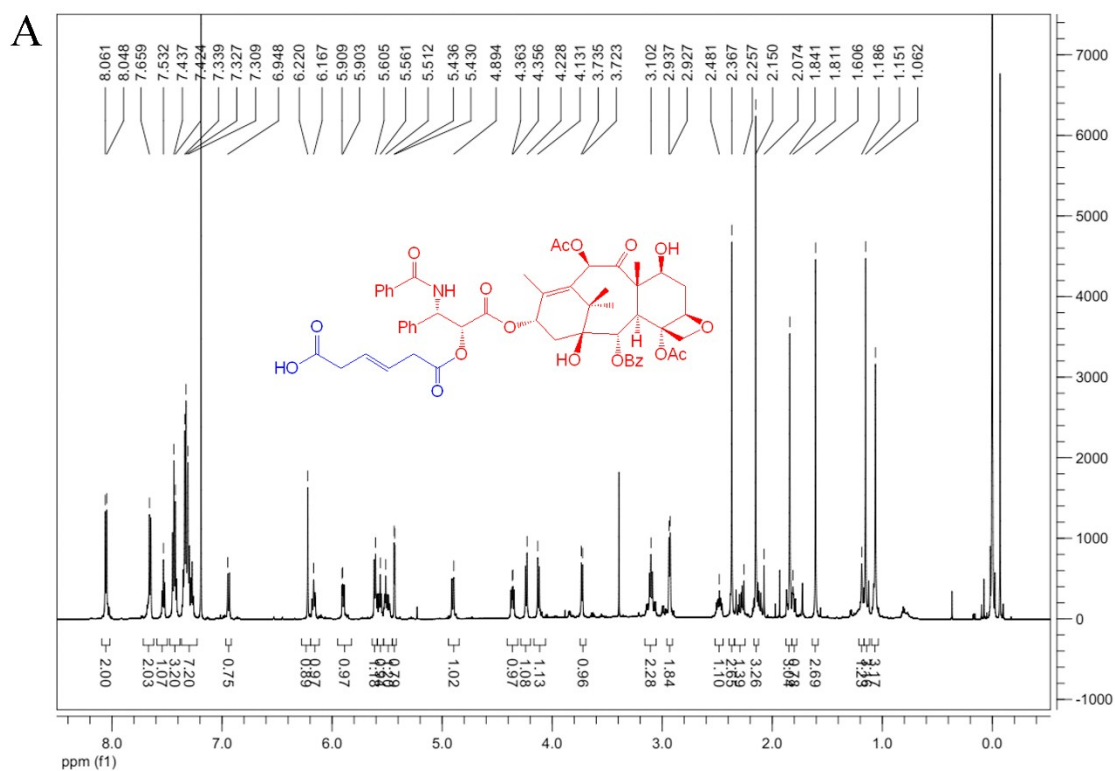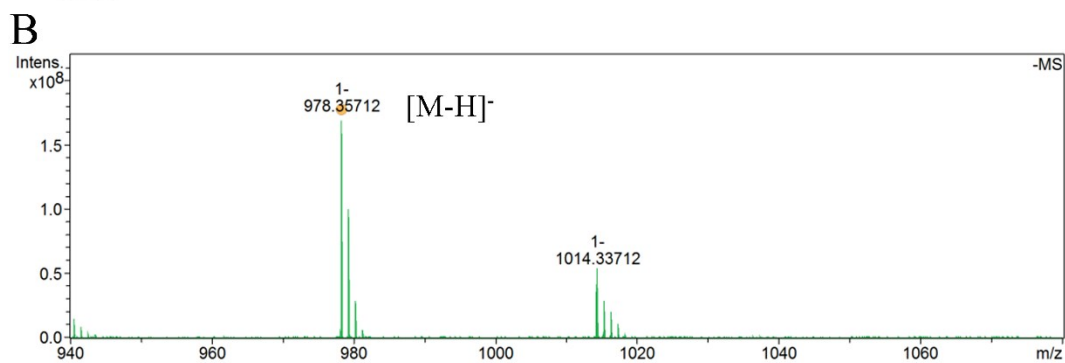

**Fig. S3** Structure confirmation of PTX-DA. **(A)** <sup>1</sup>H NMR, **(B)** MS.

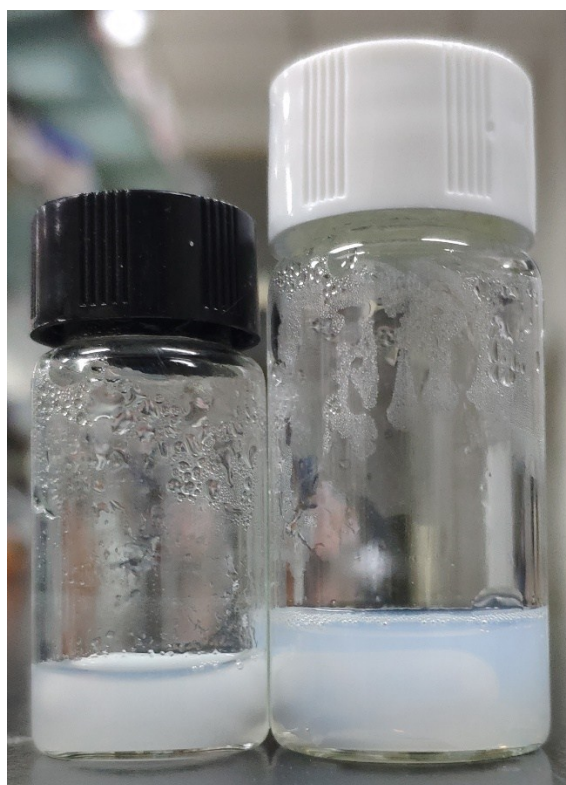

**Fig. S4** The photograph of non-gradient liposomes (left) and gradient liposomes (right) after drug loading.

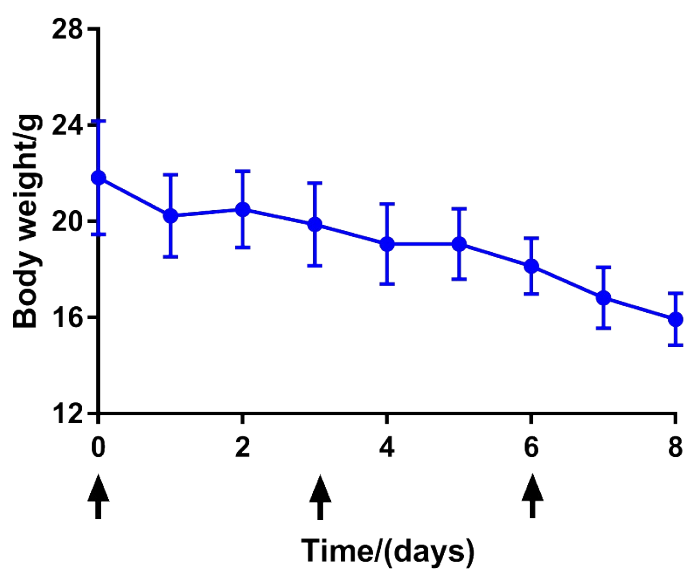

**Fig. S5** Body weight changing after intravenously injecting Taxol (30mg/kg) for three times.
